# Supplementary material for: On deep convection events and Antarctic Bottom Water formation in ocean reanalysis products
Source: Copernicus journal article supplement (doi:10.5194/os-13-851-2017), 2017-11-07
Supplement: Supplementary file 1 [file os-13-851-2017-supplement.zip]

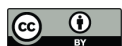

## *Supplement of*

# **On deep convection events and Antarctic Bottom Water formation in ocean reanalysis products**

**Wilton Aguiar et al.**

*Correspondence to:* Wilton Aguiar ([aguiar.wilton@gmail.com](mailto:aguiar.wilton@gmail.com))

- [os-13-851-2017-supplement-title-page.pdf](#)
- [os-2017-9-supplement-version3](#)
  - [Supplementary1.gif](#)
  - [Supplementary2.gif](#)
  - [Supplementary3.pdf](#)
  - [Thumbs.db](#)

The copyright of individual parts of the supplement might differ from the CC BY 3.0 License.
