# Supplementary figures and images for: On deep convection events and Antarctic Bottom Water formation in ocean reanalysis products
Source: Copernicus journal article supplement (doi:10.5194/os-13-851-2017), 2017-11-07

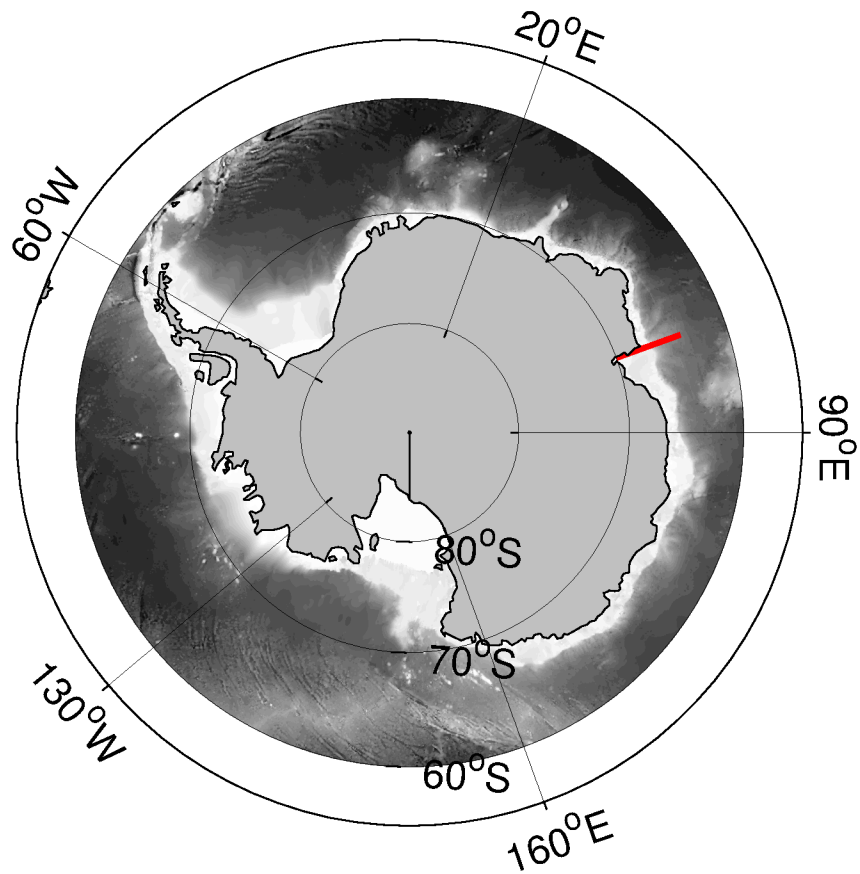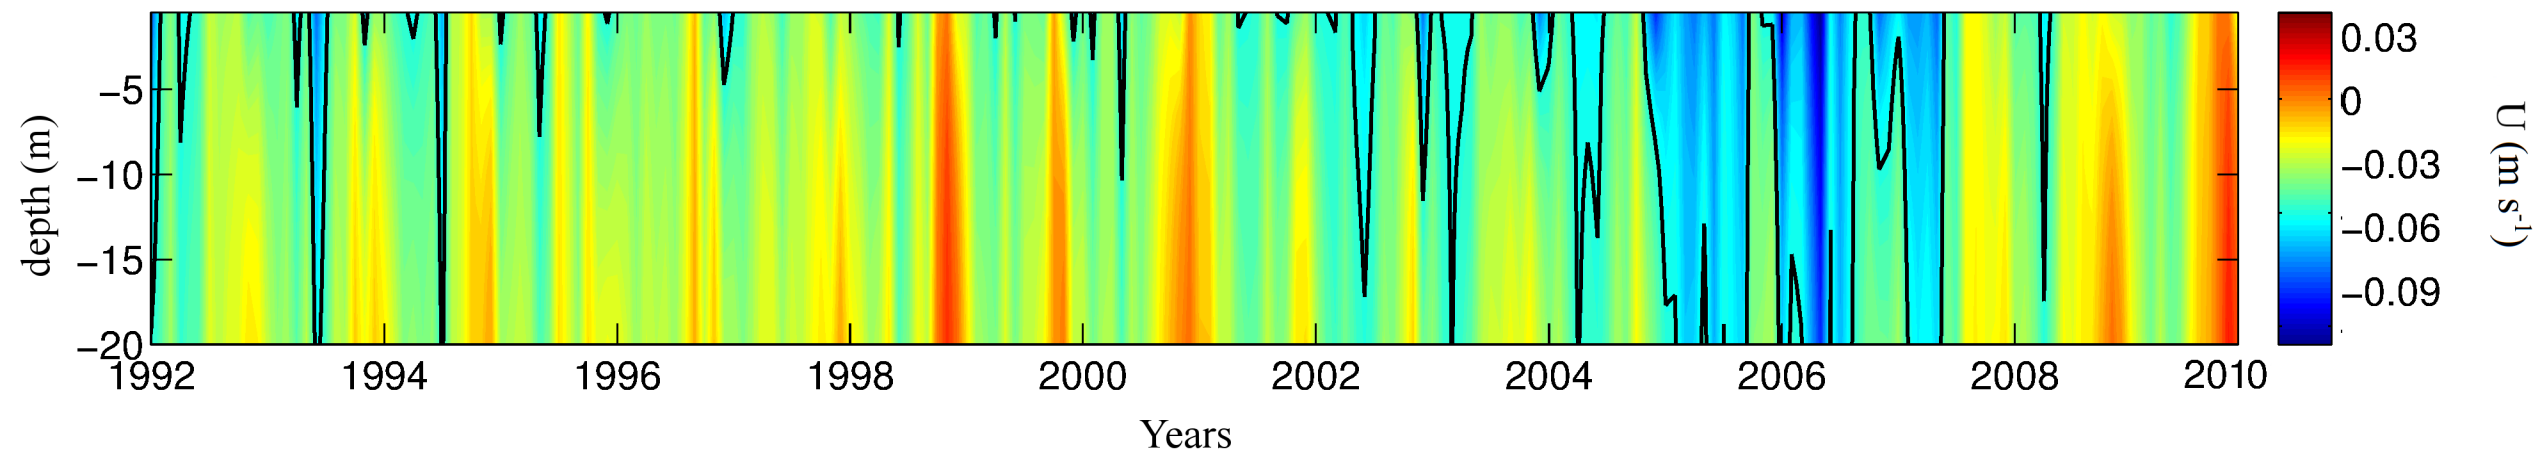

Supplement: Supplementary file 2 [file os-13-851-2017-supplement.zip]
